# Supplementary material for: Emerging Issues on Tropane Alkaloid Contamination of Food in Europe
Source: MDPI journal article supplement (doi:10.3390/toxins15020098), 2023-01-19
Supplement: s1 [file s1]

# Emerging Issues on Tropane Alkaloid Contamination of Food in Europe

Monique de Nijs, Colin Crews, Folke Dorgelo, Susan MacDonald and Patrick P. J. Mulder

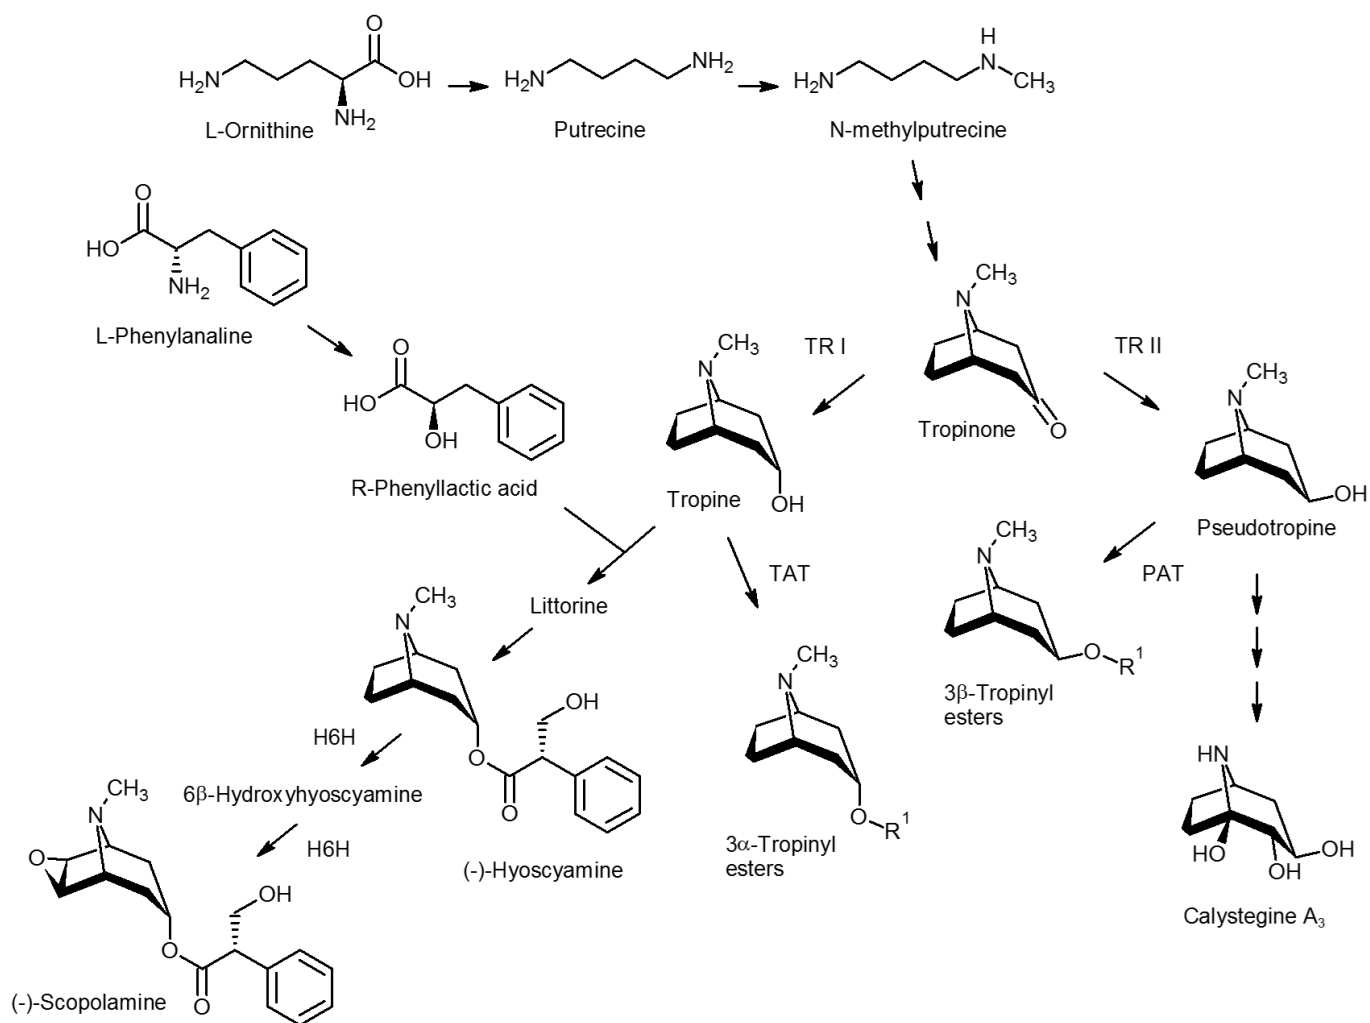

**Figure S1.** Biosynthetic pathways of tropanes from the amino acid ornithine. TR I = tropinone reductase I, TR II - tropinone reductase II, H6H: hyoscyamine 6β-hydroxylase, TAT = tropine acyltransferase, PAT = pseudotropine acyltransferase.

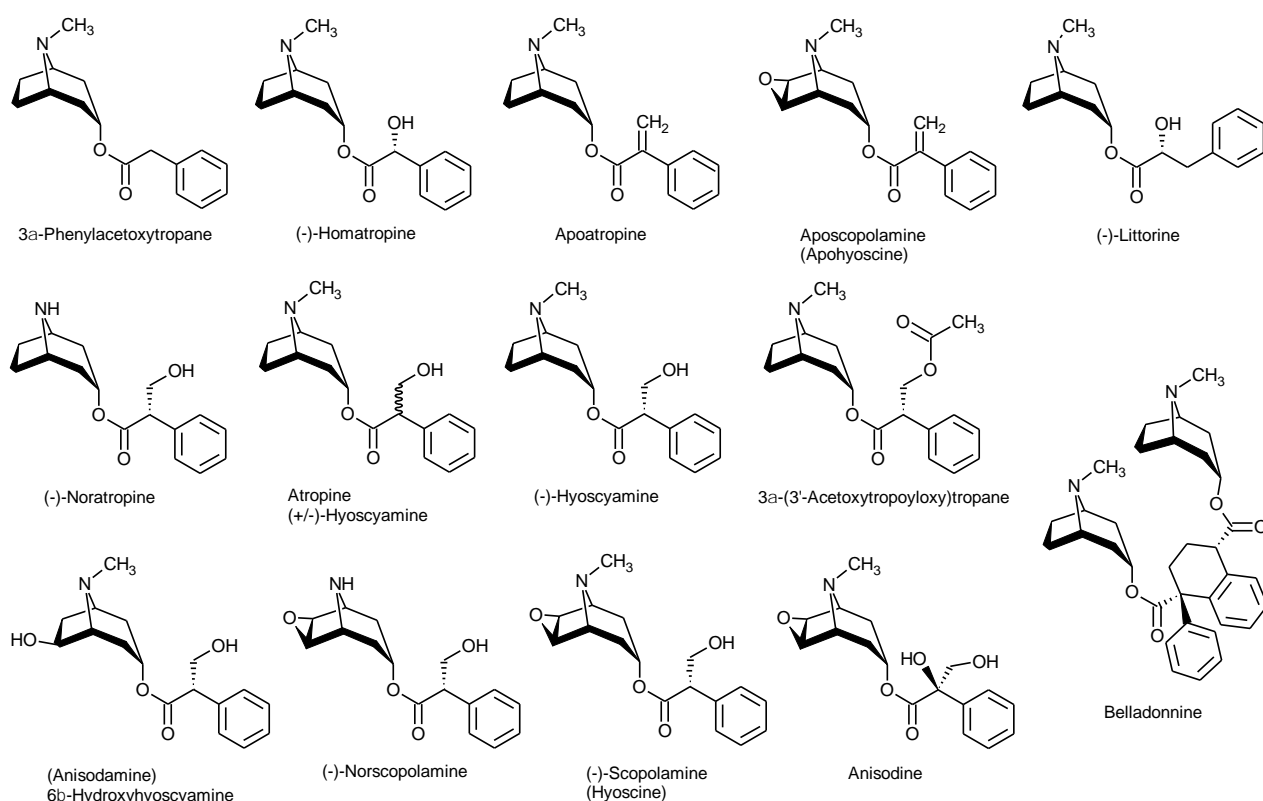

**Figure S2.** Structures of atropine and scopolamine and related compounds.

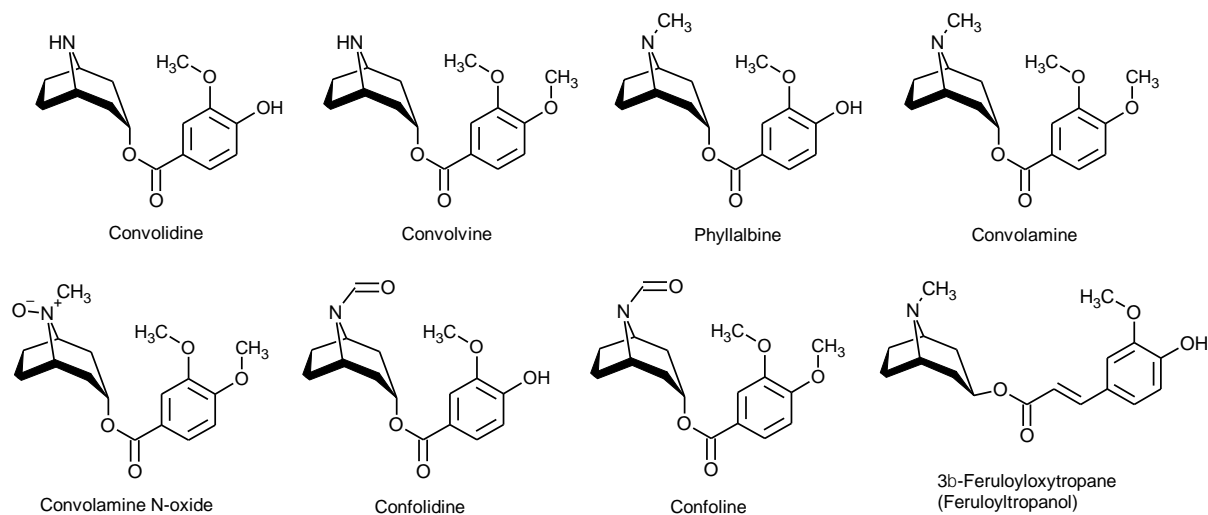

**Figure S3.** Structures of Convolvulaceae-type tropane esters

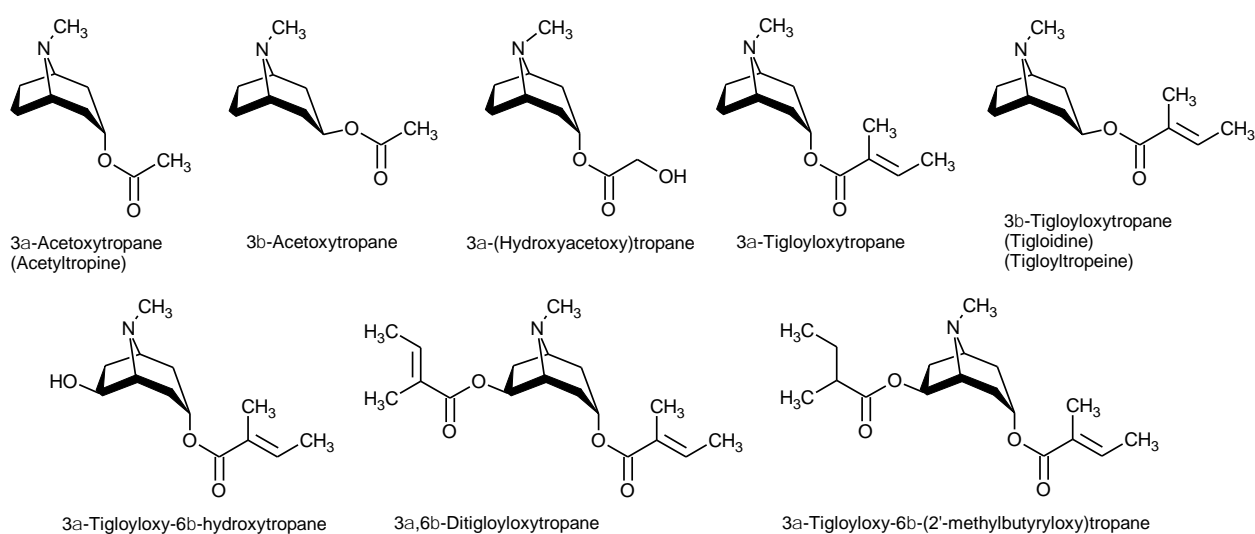

**Figure S4.** Structures of low molecular weight (LMW) tropane esters

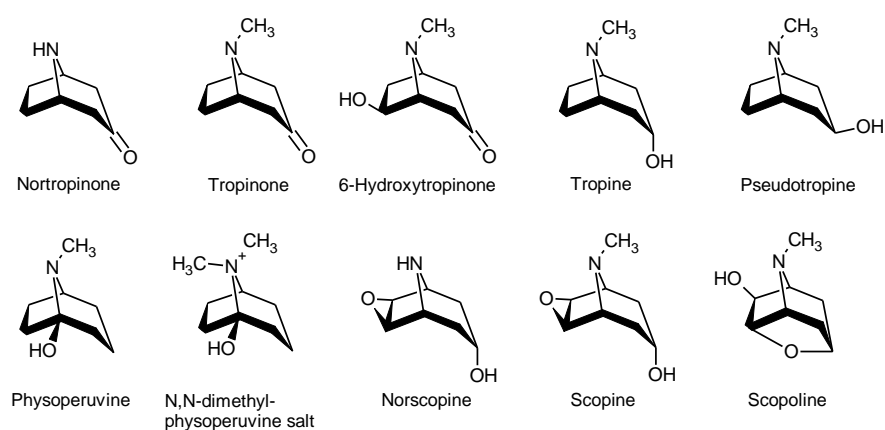

**Figure S5.** Structures of low molecular weight (LMW) tropanes.

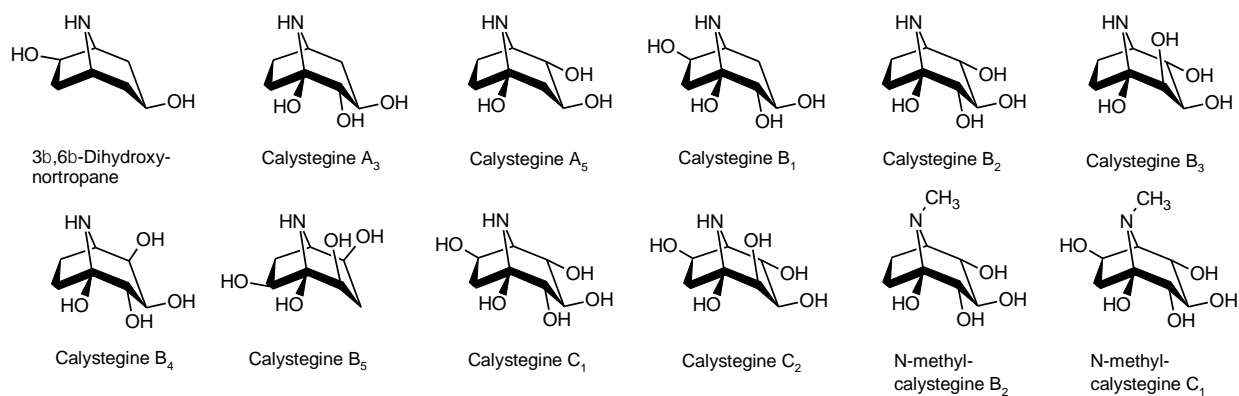

**Figure S6.** Structures of calystegines.

**Table S1.** Occurrence of calystegines in potato, eggplant and bell pepper plants from the Solanaceae family available at retail stores in Europe [31].

| Food category                       | Number of samples collected and analysed | % samples > LOD <sup>1)</sup> | Mean conc. <sup>2)</sup> (mg/kg f.w. <sup>3)</sup> ) | Maximum conc. (mg/kg f.w.) | Calystegine, mean concentration (mg/kg f.w.) |                |                |                |                |                |
|-------------------------------------|------------------------------------------|-------------------------------|------------------------------------------------------|----------------------------|----------------------------------------------|----------------|----------------|----------------|----------------|----------------|
|                                     |                                          |                               |                                                      |                            | A <sub>3</sub>                               | A <sub>5</sub> | B <sub>1</sub> | B <sub>2</sub> | B <sub>3</sub> | B <sub>4</sub> |
| <i>Potatoes</i>                     | 308                                      | 100.0%                        | 161.6                                                | 507.3                      |                                              |                |                |                |                |                |
| Potatoes, fresh                     | 297                                      | 100.0%                        | 164.0                                                | 507.3                      | 108.3                                        | 0.4            | n.d.           | 52.1           | 0.1            | 3.7            |
| Potatoes, processed                 | 11                                       | 100.0%                        | 95.6                                                 | 207.7                      | 67.1                                         | n.d.           | n.d.           | 24.7           | 0.3            | 3.5            |
| <i>Eggplant &amp; bell pepper</i>   | 96                                       | 92.7%                         | 19.8                                                 | 181.5                      |                                              |                |                |                |                |                |
| Eggplant                            | 90                                       | 96.7%                         | 21.1                                                 | 181.5                      | 2.7                                          | n.d.           | 3.9            | 14.5           | n.d.           | n.d.           |
| Bell pepper                         | 6                                        | 33.3%                         | 0.2                                                  | 0.5                        | n.d.                                         | n.d.           | 0.2            | n.d.           | n.d.           | n.d.           |
| <b>Total Solanaceae food plants</b> | <b>404</b>                               | <b>98.3%</b>                  | <b>127.9</b>                                         | <b>507.3</b>               |                                              |                |                |                |                |                |

<sup>1)</sup> >LOD = higher than Limit of Detection<sup>2)</sup> conc. = concentration<sup>3)</sup> f.w. = fresh weight

**Table S2.** Occurrence of tropane alkaloids in single component flours, cereal-based food products and other products available at retail stores in Europe [31].

| Food category                                    | Number of samples collected and analysed | All tropane alkaloids <sup>1)</sup> |                                  |                       | Atropine + scopolamine        |                    |                       |
|--------------------------------------------------|------------------------------------------|-------------------------------------|----------------------------------|-----------------------|-------------------------------|--------------------|-----------------------|
|                                                  |                                          | % samples > LOD <sup>2)</sup>       | Mean conc. <sup>3)</sup> (µg/kg) | Maximum conc. (µg/kg) | % samples > LOD <sup>2)</sup> | Mean conc. (µg/kg) | Maximum conc. (µg/kg) |
| <i>Single component flours</i>                   | 268                                      | 21.3%                               | 3.11                             | 361.2                 | 20.1%                         | 2.87               | 334.8                 |
| Buckwheat                                        | 113                                      | 9.7%                                | 2.69                             | 258.1                 | 9.7%                          | 2.58               | 246.8                 |
| Millet & sorghum                                 | 102                                      | 23.5%                               | 5.15                             | 361.2                 | 22.5%                         | 4.67               | 334.8                 |
| Corn & others                                    | 53                                       | 20.8%                               | 0.07                             | 2.2                   | 18.9%                         | 0.03               | 0.8                   |
| <i>Cereals-based products</i>                    | 838                                      | 14.0%                               | 0.30                             | 111.8                 | 12.5%                         | 0.25               | 108.5                 |
| Bread and pasta                                  | 195                                      | 9.2%                                | 0.06                             | 4.2                   | 7.7%                          | 0.04               | 4.2                   |
| Bread                                            | 114                                      | 15.8%                               | 0.10                             | 4.2                   | 13.2%                         | 0.07               | 4.2                   |
| Pasta                                            | 81                                       | 0.0%                                | 0.00                             | 0.0                   | 0.0%                          | 0.00               | 0.0                   |
| Breakfast cereals                                | 219                                      | 6.8%                                | 0.63                             | 111.8                 | 5.9%                          | 0.59               | 108.5                 |
| Biscuits and pastry                              | 164                                      | 14.6%                               | 0.14                             | 12.0                  | 13.4%                         | 0.06               | 2.3                   |
| Biscuits                                         | 150                                      | 14.7%                               | 0.14                             | 12.0                  | 13.3%                         | 0.05               | 2.3                   |
| Pastry                                           | 14                                       | 14.3%                               | 0.15                             | 1.9                   | 14.3%                         | 0.15               | 1.9                   |
| Cereal-based foods for children                  | 260                                      | 20.0%                               | 9.49                             | 859.5                 | 14.2%                         | 0.09               | 4.2                   |
| Breakfast cereals                                | 135                                      | 13.3%                               | 0.16                             | 4.5                   | 12.6%                         | 0.13               | 4.2                   |
| Cookies                                          | 107                                      | 13.1%                               | 0.85                             | 86.2                  | 11.2%                         | 0.03               | 0.8                   |
| Pasta and cereal-based meals                     | 18                                       | 55.6%                               | 130.7                            | 859.5                 | 22.2%                         | 0.20               | 1.5                   |
| <i>Other products available at retail stores</i> | 199                                      | 52.3%                               | 73.35                            | 4357.6                | 39.7%                         | 8.15               | 428.5                 |
| Dry (herbal) teas                                | 121                                      | 70.2%                               | 71.38                            | 4357.6                | 63.6%                         | 13.40              | 428.5                 |
| Legumes, stir-fry mixes, oil seeds               | 78                                       | 24.4%                               | 76.42                            | 2215.9                | 2.6%                          | 0.00               | 0.2                   |
| Legumes, stir-fry mixes                          | 65                                       | 26.2%                               | 91.70                            | 2215.9                | 0.0%                          | 0.00               | 0.0                   |
| Oil seeds                                        | 13                                       | 15.4%                               | 0.02                             | 0.2                   | 15.4%                         | 0.02               | 0.2                   |
| <b>Total</b>                                     | <b>1305</b>                              | <b>22.5%</b>                        | <b>12.90</b>                     | <b>4357.6</b>         | <b>18.5%</b>                  | <b>1.96</b>        | <b>428.5</b>          |

<sup>1)</sup> Analysis of 24 tropane alkaloids, including atropine and scopolamine.<sup>2)</sup> Products containing at least one tropane alkaloid above the Limit of Detection (LOD). LOD differs between components, matrices and laboratories.<sup>3)</sup> conc. = concentration.

**Table S3.** RASFF notifications for tropane alkaloids atropine and scopolamine in food (December 31, 2022) [109]

| Type                                   | Date of case | Reference | Notifying country | Product Category                             | Food                                    | Country of origin | Concentration (µg/kg) |             |
|----------------------------------------|--------------|-----------|-------------------|----------------------------------------------|-----------------------------------------|-------------------|-----------------------|-------------|
|                                        |              |           |                   |                                              |                                         |                   | Atropine              | Scopolamine |
| Alert notification <sup>1)</sup>       | 27/7/2022    | 2022.4374 | Germany           | Prepared dishes and snacks                   | Tortilla chips                          | Undecided         | NR*                   |             |
| Alert notification                     | 27/7/2022    | 2022.4371 | Germany           | Prepared dishes and snacks                   | Tortilla chips                          | Belgium           | NR                    |             |
| Alert notification                     | 1/7/2022     | 2022.3840 | Germany           | Prepared dishes and snacks                   | Corn chips                              | Belgium           | NR                    |             |
| Alert notification                     | 6/5/2022     | 2022.2692 | Germany           | Herbs and spices                             | Savory                                  | Austria           | Sum 106±21.2          |             |
| Alert notification                     | 7/4/2022     | 2022.2074 | Germany           | Food additives and flavorings                | Soybean meal                            | Austria           | 56                    | -           |
| Alert notification                     | 9/11/2021    | 2021.6084 | Belgium           | Cereals and bakery products                  | Corn flour                              | Belgium           | 25.12                 | 6.50        |
| Information notification for follow-up | 9/11/2021    | 2021.6059 | Belgium           | Cocoa and cocoa preparations, coffee and tea | Infusion                                | Netherlands       | 184                   | 21          |
| Alert notification                     | 8/11/2021    | 2021.6052 | Germany           | Cereals and bakery products                  | Organic flaxseed meal                   | Hungary           | 100-238               | -           |
| Notification                           | 12/08/2021   | 2021.4323 | Germany           | Other food product/ mixed                    | Buckwheat flour, extruded               | Austria/Germany   | 240+97                | 87+35       |
| Alert                                  | 20/07/2021   | 2021.3836 | Germany           | Herbs and spices                             | Parsley stalks, broken                  | Hungary           | NR                    | NR          |
| Alert                                  | 07/04/2021   | 2021.1741 | Germany           | Cereals and bakery products                  | Millet                                  | the Netherlands   | 40.1                  | 29.1        |
| Alert                                  | 17/03/2021   | 2021.1390 | Slovakia          | Fruits and vegetables                        | Frozen spinach puree                    | Slovakia          | 850-3,446             | 1,033-3,860 |
| Alert                                  | 18/01/2021   | 2021.0236 | Germany           | Cereals and bakery products                  | Popcorn maize                           | Spain             | 23, 35                | 1.2, 1.9    |
| Information                            | 11/12/2020   | 2020.5696 | Germany           | Cereals and bakery products                  | Wild ground brown millet                | Germany           | 36                    | 22.4        |
| Alert                                  | 27/11/2020   | 2020.5394 | Belgium           | Cereals and bakery products                  | Maize for popcorn                       | Belgium           | -                     | 14.6        |
| Information                            | 04/11/2020   | 2020.4733 | Germany           | Herbs and spices                             | Peppermint                              | Turkey            | 26.8                  | 39.9        |
| Information                            | 04/09/2020   | 2020.3576 | Germany           | Cereals and bakery products                  | Wild brown millet                       | Germany           | 24.2                  | 13.3        |
| Information                            | 25/05/2020   | 2020.2159 | Germany           | Cocoa and cocoa preparations, coffee and tea | Blackberry leaves                       | Bulgaria          | 543.1                 | 31.4        |
| Alert                                  | 24/01/2020   | 2020.0366 | Germany           | Cereals and bakery products                  | Soy flakes                              | Czech Republic    | 19                    | 6.4         |
| Alert                                  | 26/08/2019   | 2019.3045 | France            | Cereals and bakery products                  | Buckwheat                               | France            | 47                    | 30          |
| Alert                                  | 06/08/2019   | 2019.2867 | Netherlands       | Cereals and bakery products                  | Breakfast porridge 8 cereals with honey | Spain             | 2.2                   | 2.7         |

| Type        | Date of case | Reference | Notifying country | Product Category                                  | Food                                              | Country of origin       | Concentration (µg/kg) |               |
|-------------|--------------|-----------|-------------------|---------------------------------------------------|---------------------------------------------------|-------------------------|-----------------------|---------------|
|             |              |           |                   |                                                   |                                                   |                         | Atropine              | Scopolamine   |
| Information | 01/04/2019   | 2019.1214 | Croatia           | Cereals and bakery products                       | Corn grits                                        | Serbia                  | 4.5                   | 4.3           |
| Information | 29/01/2019   | 2019.0315 | Croatia           | Cocoa and cocoa preparations, coffee and tea      | Peppermint                                        | Serbia                  | 200.5                 | 488.7         |
| Alert       | 20/12/2018   | 2018.3720 | France            | Cereals and bakery products                       | Organic buckwheat flour                           | France                  | 53                    | 20            |
| Alert       | 26/09/2018   | 2018.2695 | Germany           | Cereals and bakery products                       | Organic muesli                                    | Austria                 | 60.7                  | 38.8          |
| Alert       | 16/07/2018   | 2018.2009 | Czech Republic    | Herbs and spices                                  | Herbal infusion                                   | Poland                  | 213                   | 44.7          |
| Alert       | 24/05/2018   | 2018.1447 | Germany           | Cereals and bakery products                       | Popcorn                                           | France                  | 6.60                  | 1.77          |
| Information | 21/03/2018   | 2018.0774 | Hungary           | Nuts, nut products and seeds                      | Whole cumin seeds                                 | Hungary                 | 16,177.6              | 4,658.3       |
| Alert       | 07/06/2017   | 2017.0803 | United Kingdom    | Dietetic foods, food supplements, fortified foods | Dried herbs ( <i>Ruscus aculeatus</i> )           | Bulgaria                | NR                    | NR            |
| Alert       | 24/02/2017   | 2017.0239 | Czech Republic    | Cocoa and cocoa preparations, coffee and tea      | Herbal tea with Echinacea                         | Poland                  | 72                    | 23            |
| Alert       | 06/02/2017   | 2017.0153 | Germany           | Cocoa and cocoa preparations, coffee and tea      | Organic burdock root ( <i>Arctium lappa</i> ) tea | Albania/Croatia         | 520                   | NR            |
| Alert       | 28/12/2016   | 2016.1818 | Czech Republic    | Cocoa and cocoa preparations, coffee and tea      | Herbal tea                                        | Poland                  | 206.4                 | 31.7          |
| Alert       | 20/09/2016   | 2016.1298 | Austria           | Cereals and bakery products                       | Millet flour                                      | Hungary                 | 23.5                  | 9.5           |
| Alert       | 22/07/2016   | 2016.0975 | Austria           | Cereals and bakery products                       | Corn                                              | Germany                 | 10.5; 12.2; 12.3      | 2.0; 3.8; 3.1 |
| Alert       | 13/04/2016   | 2016.0144 | Czech Republic    | Dietetic foods, food supplements, fortified foods | Baby porridge without milk                        | Spain                   | 7.9                   | NR            |
| Alert       | 01/02/2016   | 2016.0106 | Czech Republic    | Cereals and bakery products                       | Gluten-free baking mix based on sorghum           | Czech Republic          | 180; 130              | 36; 27        |
| Alert       | 26/11/2015   | 2015.1487 | Czech Republic    | Cereals and bakery products                       | Sorghum flour                                     | Czech Republic/Slovakia | 1,200; 1,500          | 360; 460      |
| Alert       | 18/09/2015   | 2015.1190 | Germany           | Cereals and bakery products                       | Microwave popcorn                                 | Spain                   | 29                    | 6             |
| Alert       | 04/06/2015   | 2015.0684 | Germany           | Cereals and bakery products                       | Organic polenta cornmeal                          | Germany                 | 198.5                 | 45            |
| Alert       | 31/03/2015   | 2015.0399 | Germany           | Cereals and bakery products                       | Millet balls                                      | Hungary                 | 384                   | 388           |

| Type        | Date of case | Reference | Notifying country | Product Category                                  | Food                                | Country of origin                       | Concentration (µg/kg) |             |
|-------------|--------------|-----------|-------------------|---------------------------------------------------|-------------------------------------|-----------------------------------------|-----------------------|-------------|
|             |              |           |                   |                                                   |                                     |                                         | Atropine              | Scopolamine |
| Alert       | 30/03/2015   | 2015.0388 | Austria           | Cereals and bakery products                       | Gluten free organic millet          | Austria                                 | 30                    | 24          |
| Alert       | 30/03/2015   | 2015.0387 | Austria           | Cereals and bakery products                       | Millet honey poppies                | Germany                                 | 26                    | 11          |
| Alert       | 20/03/2015   | 2015.0339 | Austria           | Cereals and bakery products                       | Millet dumplings                    | Hungary                                 | 304                   | 358         |
| Alert       | 20/03/2015   | 2015.0338 | Austria           | Cereals and bakery products                       | Organic millet dumplings            | Hungary                                 | 481                   | 533         |
| Alert       | 20/02/2015   | 2015.0210 | Germany           | Cereals and bakery products                       | Organic polenta cornmeal            | Germany                                 | 156.2; 207.5          | 27.2; 31.3  |
| Alert       | 20/02/2015   | 2015.0203 | Austria           | Cereals and bakery products                       | Brown millet                        | Germany                                 | 62                    | 33          |
| Alert       | 18/12/2014   | 2014.1724 | Germany           | Dietetic foods, food supplements, fortified foods | Millet/cereal porridge with rice    | Hungary                                 | 36.6                  | NR          |
| Alert       | 11/12/2014   | 2014.1694 | Germany           | Dietetic foods, food supplements, fortified foods | Organic baby food apple pear millet | Germany                                 | 3.7; 6.7; 31.9        | NR          |
| Alert       | 04/12/2014   | 2014.1652 | Germany           | Cereals and bakery products                       | Brown millet flour                  | Austria/<br>Hungary/<br>the Netherlands | 46                    | 25          |
| Alert       | 21/11/2014   | 2014.1596 | Germany           | Dietetic foods, food supplements, fortified foods | Baby food porridge                  | Germany/<br>Austria                     | 12.1                  | NR          |
| Alert       | 13/06/2013   | 2013.0829 | Slovenia          | Cereals and bakery products                       | Buckwheat flour                     | Austria/<br>Slovakia                    | 18                    | 5.5         |
| Alert       | 22/05/2013   | 2013.0706 | Slovenia          | Cereals and bakery products                       | Buckwheat flour                     | Czech Republic                          | 14                    | 11          |
| Information | 08/06/2012   | 2012.0794 | Slovenia          | Cereals and bakery products                       | Buckwheat flour                     | Slovenia                                | 20                    | 6.1         |
| Information | 30/04/2009   | 2009.0558 | Slovenia          | Cereals and bakery products                       | Buckwheat flour                     | Hungary                                 | 110                   | 47          |
| Information | 03/07/2006   | 2006.BMT  | Slovenia          | Cereals and bakery products                       | Buckwheat flour                     | Ukraine                                 | 37                    | 48          |
| Alert       | 03/07/2006   | 2006.0424 | Slovenia          | Cereals and bakery products                       | Buckwheat flour                     | Czech Republic                          | 35                    | 65          |
| Alert       | 28/10/1994   | 1994.18   | United Kingdom    | Cocoa, coffee and tea                             | Burdock root tea                    | United Kingdom                          | NR                    | NR          |

\* NR = not reported.

<sup>1)</sup> updated version of the RASSF portal from mid-2021 makes no difference between alert or notification and Alert notification.



**Table S4.** RASFF notifications for Atropa, Belladonna, Datura, Hyoscyamus, Mandragora and Solanum in food and feed (December 31, 2022) [109]

| Type                | Date of case | Reference | Notifying country | Product Category             | Food                           | Country of origin | Contaminant plant           | Concentration |
|---------------------|--------------|-----------|-------------------|------------------------------|--------------------------------|-------------------|-----------------------------|---------------|
| Alert <sup>1)</sup> | 23/01/2013   | 2013.0079 | The Netherlands   | Herbs and spices             | Marshmallow tea                | Germany/Bulgaria  | <i>A. belladonna</i> root   | NR*           |
| Alert               | 29/06/1989   | 1989.15   | France            | Herbs and spices             | Burdock root                   | NM                | Belladonna                  | NR            |
| Alert               | 23/01/1984   | 1984.03   | France            | Cocoa, coffee and tea        | Bardane herbal tea             | NM                | Belladonna                  | NR            |
| Alert               | 04/02/1983   | 1983.03   | United Kingdom    | Cocoa, coffee and tea        | Tea                            | NM                | Belladonna                  | NR            |
| Alert               | 17/12/2020   | 2020.5838 | Hungary           | Cereals and bakery products  | Grain oatmeal                  | Poland            | <i>D. stramonium</i> seeds  | NR            |
| Alert               | 20/09/2019   | 2019.3340 | France            | Fruits and vegetables        | Canned peeled tomatoes         | Spain             | <i>D. stramonium</i> fruits | NR            |
| Alert               | 12/09/2020   | 2019.3256 | Austria           | Compound feeds               | Seedmix for birds              | The Netherlands   | <i>D. stramonium</i> seeds  | 0.1235%       |
| Alert               | 15/03/2019   | 2019.0993 | France            | Fruits and vegetables        | Frozen beans                   | France            | <i>D. stramonium</i> seeds  | NR            |
| Information         | 01/02/2019   | 2019.0379 | Belgium           | Feed material                | Sunflower seeds                | The Netherlands   | <i>D. stramonium</i> seeds  | 0.12%         |
| Alert               | 17/05/2013   | 2013.0696 | Finland           | Fruits and vegetables        | Frozen vegetable-bean-seed mix | Belgium/Spain     | <i>D. stramonium</i> seeds  | NR            |
| Information         | 07/03/2012   | 2012.0354 | Denmark           | Bird feed                    | Sunflower seeds                | France            | <i>D. stramonium</i> seeds  | 0.1862%       |
| Information         | 02/10/2007   | 2007.CGO  | Spain             | Fruits and vegetables        | Vegetable bacon stir-fry       | Spain             | <i>D. stramonium</i> seeds  | NR            |
| Alert               | 05/09/2007   | 2007.0613 | Austria           | Fruits and vegetables        | Canned green beans             | Hungary           | <i>D. stramonium</i> fruit  | NR            |
| Alert               | 27/11/2006   | 2006.0835 | Austria           | Fruits and vegetables        | Canned green beans             | Hungary           | <i>D. stramonium</i> fruit  | NR            |
| Alert               | 27/11/2006   | 2006.0833 | Austria           | Cereals and bakery products  | Organic millet                 | Austria/Hungary   | <i>D. stramonium</i> seeds  | 130 seeds/kg  |
| Information         | 20/11/2006   | 2006.CRE  | Austria           | Cereals and bakery products  | Brown millet                   | Austria           | <i>D. stramonium</i> seeds  | NR            |
| Information         | 08/11/2006   | 2006.COH  | Austria           | Cereals and bakery products  | Organic millet                 | Austria           | <i>D. stramonium</i> seeds  | NR            |
| Alert               | 24/10/2006   | 2006.0737 | Austria           | Cereals and bakery products  | Organic millet                 | Austria           | <i>D. stramonium</i> seeds  | NR            |
| Information         | 10/10/2006   | 2006.CFX  | Austria           | Cereals and bakery products  | Peeled bio gold millet         | Austria           | <i>D. stramonium</i> seeds  | NR            |
| Information         | 28/08/2006   | 2006.BYZ  | Germany           | Pet food                     | Red millet seeds               | Hungary           | <i>D. stramonium</i> seeds  | 0.276%        |
| Alert               | 06/05/2008   | 2008.0520 | Czech Republic    | Nuts, nut products and seeds | Poppy seeds                    | Czech Republic    | <i>H. niger</i> seeds       | 0.13%         |
| Alert               | 13/04/2007   | 2007.0267 | Slovakia          | Nuts, nut products and seeds | Poppy seeds                    | Czech Republic    | <i>H. niger</i> seeds       | 0.24%         |
| Alert               | 10/04/2007   | 2007.0256 | Slovakia          | Nuts, nut products and seeds | Poppy seeds                    | Czech Republic    | <i>H. niger</i> seeds       | 0.42%         |

| Type               | Date of case | Reference | Notifying country | Product Category      | Food          | Country of origin | Contaminant plant | Concentration |
|--------------------|--------------|-----------|-------------------|-----------------------|---------------|-------------------|-------------------|---------------|
| Alert notification | 10/10/2022   | 2022.5877 | Italy             | Fruits and vegetables | Fresh spinach | Italy             | <i>Mandragora</i> | NR            |
| Alert notification | 24/12/2021   | 2021.7140 | Belgium           | Fruits and vegetables | Frozen peas   | Belgium           | <i>S. nigrum</i>  | NR            |

\* NR = not reported.

<sup>1)</sup> updated version of the RASSF portal from mid-2021 makes no difference between alert or notification and alert notification.
